# Supplementary material for: Two new models for viscosity prediction of binary, ternary and higher order liquid mixtures
Source: Royal Society of Chemistry journal article supplement (doi:10.1039/c6ra24532c), 2016-01-01
Supplement: c6ra24532c1.pdf [file c6ra24532c1.pdf]

## Two new models for viscosity prediction of binary, ternary and higher order liquid mixtures

Akanksha Saini, Shashwat Verma , Aditya Harshavardhan and Ranjan Dey\*

Department of Chemistry, BITS Pilani K K Birla Goa Campus, Zuarinagar, Goa, 403726, India.

\*email id : ranjandey@goa.bits-pilani.ac.in

### SUPPLEMENTARY INFORMATION

**Table S1:** Comparison of AAPD values of various viscosity relation for n-alkane binary mixtures at 298.15 K.

| S.No. | Binary Systems*       | Bingham     | Frenkel     | KM          | HU          | SW          | Model1      | Model 2     | ECN         | UNIFAC      |
|-------|-----------------------|-------------|-------------|-------------|-------------|-------------|-------------|-------------|-------------|-------------|
| 1     | Decane + Dodecane     | 1.52        | 0.92        | 1.18        | 1.52        | 0.95        | 0.80        | 0.98        | 5.86        | 0.68        |
| 2     | Decane + Hexadecane   | 9.47        | 1.42        | 5.80        | 9.47        | 4.11        | 2.29        | 3.93        | 1.03        | 1.31        |
| 3     | Decane + Undecane     | 0.37        | 0.40        | 0.55        | 0.37        | 0.49        | 0.39        | 0.49        | 7.12        | 0.36        |
| 4     | Dodecane + Hexadecane | 4.78        | 2.26        | 1.58        | 4.78        | 1.03        | 1.99        | 1.01        | 3.91        | 1.03        |
| 5     | Heptane + Decane      | 3.00        | 0.87        | 2.69        | 3.00        | 1.49        | 0.60        | 1.59        | 2.99        | 1.79        |
| 6     | Heptane + Dodecane    | 11.05       | 2.97        | 3.98        | 11.05       | 1.42        | 3.59        | 1.48        | 5.14        | 1.55        |
| 7     | Heptane + Hexadecane  | 25.16       | 2.68        | 13.68       | 25.16       | 9.37        | 5.61        | 8.40        | 12.93       | 0.47        |
| 8     | Heptane + Nonane      | 2.10        | 0.76        | 0.88        | 2.10        | 0.62        | 0.78        | 0.63        | 4.35        | 0.71        |
| 9     | Heptane + Octane      | 0.96        | 0.68        | 0.46        | 0.96        | 0.54        | 0.68        | 0.53        | 6.02        | 0.63        |
| 10    | Heptane + Undecane    | 6.59        | 1.44        | 3.21        | 6.59        | 1.36        | 1.72        | 1.44        | 0.91        | 0.45        |
| 11    | Hexane + Decane       | 5.10        | 1.66        | 4.70        | 5.10        | 2.32        | 0.77        | 2.49        | 0.98        | 0.61        |
| 12    | Hexane + Dodecane     | 14.17       | 3.12        | 7.23        | 14.17       | 3.20        | 3.29        | 3.24        | 9.92        | 1.37        |
| 13    | Hexane + Heptane      | 0.62        | 0.39        | 0.31        | 0.62        | 0.35        | 0.39        | 0.34        | 6.40        | 0.29        |
| 14    | Hexane + Hexadecane   | 29.90       | 2.31        | 18.16       | 29.90       | 12.43       | 3.41        | 11.11       | 17.54       | 0.703       |
| 15    | Hexane + Nonane       | 3.53        | 0.78        | 2.20        | 3.53        | 0.66        | 0.82        | 0.79        | 1.51        | 0.701       |
| 16    | Hexane + Octane       | 2.00        | 0.79        | 0.76        | 2.00        | 0.51        | 0.80        | 0.48        | 4.03        | 0.66        |
| 17    | Hexane + Undecane     | 9.65        | 2.11        | 5.44        | 9.65        | 2.21        | 1.06        | 2.36        | 5.74        | 1.42        |
| 18    | Nonane + Decane       | 0.62        | 0.71        | 0.83        | 0.62        | 0.78        | 0.71        | 0.79        | 7.18        | 0.62        |
| 19    | Nonane + Dodecane     | 4.33        | 2.25        | 0.96        | 4.33        | 0.63        | 1.94        | 0.66        | 2.90        | 1.75        |
| 20    | Nonane + Hexadecane   | 14.01       | 2.14        | 7.81        | 14.01       | 5.39        | 3.54        | 5.04        | 3.12        | 2.1         |
| 21    | Nonane + Undecane     | 2.07        | 0.92        | 0.69        | 2.07        | 0.54        | 0.97        | 0.56        | 5.06        | 0.54        |
| 22    | Octane + Decane       | 1.06        | 0.58        | 1.49        | 1.06        | 1.01        | 0.45        | 1.05        | 5.94        | 0.55        |
| 23    | Octane + Dodecane     | 7.01        | 2.19        | 2.22        | 7.01        | 0.88        | 2.53        | 0.94        | 0.70        | 1.03        |
| 24    | Octane + Hexadecane   | 19.57       | 2.62        | 10.07       | 19.57       | 6.76        | 3.21        | 6.18        | 7.75        | 0.46        |
| 25    | Octane + Nonane       | 1.31        | 2.99        | 0.75        | 1.31        | 0.83        | 1.00        | 0.81        | 5.80        | 0.59        |
| 26    | Octane + Undecane     | 3.91        | 1.21        | 1.35        | 3.91        | 0.50        | 0.34        | 0.55        | 2.80        | 0.52        |
| 27    | Pentane + Decane      | 7.39        | 2.29        | 8.41        | 7.39        | 4.31        | 0.81        | 4.49        | 6.40        | 5.03        |
| 28    | Pentane + Dodecane    | 17.19       | 2.48        | 12.30       | 17.19       | 6.37        | 1.51        | 6.27        | 16.19       | 4.28        |
| 29    | Pentane + Heptane     | 0.95        | 2.90        | 2.27        | 1.45        | 1.25        | 0.80        | 1.29        | 4.91        | 2.74        |
| 30    | Pentane + Hexadecane  | 34.59       | 4.30        | 24.43       | 34.59       | 17.06       | 2.19        | 15.16       | 23.32       | 3.69        |
| 31    | Pentane + Hexane      | 0.99        | 1.59        | 0.21        | 0.99        | 0.49        | 0.61        | 0.49        | 5.68        | 0.52        |
| 32    | Pentane + Nonane      | 5.51        | 0.12        | 5.02        | 5.51        | 1.98        | 0.28        | 2.15        | 3.46        | 3.37        |
| 33    | Pentane + Octane      | 3.04        | 1.78        | 3.13        | 3.04        | 1.14        | 0.25        | 1.25        | 0.64        | 2.82        |
| 34    | Pentane + Undecane    | 11.95       | 1.02        | 10.02       | 11.95       | 5.00        | 0.87        | 5.04        | 11.86       | 0.45        |
| 35    | Undecane + Dodecane   | 1.75        | 1.89        | 1.24        | 1.75        | 1.30        | 1.14        | 1.30        | 5.49        | 1.12        |
| 36    | Undecane + Hexadecane | 7.12        | 1.79        | 3.00        | 7.12        | 1.88        | 2.02        | 1.78        | 2.29        | 0.4         |
|       | <b>Grand AAPD</b>     | <b>7.62</b> | <b>1.70</b> | <b>4.70</b> | <b>7.63</b> | <b>2.81</b> | <b>1.50</b> | <b>2.70</b> | <b>6.05</b> | <b>1.31</b> |

\*Ref#[29]

**Table S2:** Comparison of AAPD values of various viscosity models for Binary systems at different temperatures.

| S.No | Binary Systems                            | Temp (K) | Bingham | Frenkel | KM    | HU     | SW    | Model 1 | Logarithmic | ECN   | Ref. |
|------|-------------------------------------------|----------|---------|---------|-------|--------|-------|---------|-------------|-------|------|
| 1    | JP-10 + n-octane                          | 293.15   | 45.09   | 26.74   | 12.39 | 45.09  | 7.24  | 31.55   | 10.41       | 27.04 | 30   |
| 2    | JP-10 + 2,2,4-trimethylpentane            | 293.15   | 43.10   | 23.82   | 9.04  | 43.10  | 3.63  | 34.39   | 7.65        | 23.50 | 30   |
| 3    | JP-10 + 2,4-dimethylhexane                | 293.15   | 52.90   | 30.37   | 13.47 | 52.90  | 6.91  | 29.82   | 11.29       | 28.47 | 30   |
| 4    | JP-10 + 3-methylheptane                   | 293.15   | 49.01   | 28.67   | 13.10 | 49.01  | 7.30  | 37.20   | 10.99       | 27.93 | 30   |
| 5    | Pyridine + m xylene                       | 293.15   | 10.67   | 9.08    | 7.53  | 10.67  | 8.47  | 7.45    | 6.87        | 1.47  | 31   |
| 6    | Pyridine + o xylene                       | 293.15   | 4.01    | 3.73    | 3.46  | 4.01   | 3.96  | 3.53    | 3.51        | 5.50  | 31   |
| 7    | Pyridine + p xylene                       | 293.15   | 8.44    | 7.11    | 5.80  | 8.44   | 6.70  | 5.84    | 5.44        | 2.22  | 31   |
| 8    | Phenetole + 1-pentanol                    | 293.15   | 43.14   | 35.38   | 28.41 | 43.14  | 24.01 | 45.48   | 20.40       | 35.00 | 32   |
| 9    | phenetole + 1-hexanol                     | 293.15   | 60.45   | 46.66   | 35.01 | 60.45  | 25.02 | 56.12   | 28.98       | 49.67 | 32   |
| 10   | phenetole + 1-heptanol                    | 293.15   | 66.46   | 46.07   | 30.13 | 66.46  | 19.76 | 56.43   | 24.68       | 51.96 | 32   |
| 11   | phenetole + 1-octanol                     | 293.15   | 71.38   | 43.73   | 23.57 | 71.38  | 12.81 | 55.60   | 19.32       | 51.86 | 32   |
| 12   | Propyl Propanoate + Hexane                | 298.15   | 11.32   | 8.13    | 5.18  | 11.32  | 6.09  | 7.20    | 5.18        | 1.50  | 33   |
| 13   | Propyl Propanoate + Benzene               | 298.15   | 2.65    | 2.63    | 2.61  | 2.65   | 2.69  | 4.10    | 3.41        | 4.94  | 33   |
| 14   | Hexane + Benzene                          | 298.15   | 18.41   | 15.78   | 13.20 | 18.41  | 11.01 | 17.20   | 11.40       | 6.42  | 33   |
| 15   | 1,4-Dioxane + Ethanediol                  | 298.15   | 124.78  | 69.55   | 35.20 | 124.78 | 10.67 | 133.75  | 30.10       | 77.30 | 34   |
| 16   | 1,4-Dioxane + Tributylamine               | 298.15   | 10.00   | 9.88    | 9.76  | 10.00  | 10.22 | 15.87   | 12.73       | 3.34  | 34   |
| 17   | 1,4-Dioxane + Triethylamine               | 298.15   | 28.90   | 20.83   | 13.71 | 28.90  | 7.88  | 27.14   | 11.38       | 12.32 | 34   |
| 18   | Ethylmethylketone + 2-propanol            | 298.15   | 42.44   | 25.63   | 12.28 | 42.44  | 2.33  | 42.10   | 10.50       | 41.13 | 35   |
| 19   | Ethylmethylketone + 2-Butanol             | 298.15   | 45.07   | 19.41   | 3.35  | 45.07  | 9.61  | 36.49   | 2.79        | 39.36 | 35   |
| 20   | Ethylmethylketone + 2-pentanol            | 298.15   | 87.51   | 50.09   | 24.52 | 87.51  | 13.21 | 63.23   | 20.81       | 77.98 | 35   |
| 21   | Ethylmethylketone+ 2-hexanol              | 298.15   | 83.21   | 41.55   | 14.94 | 83.21  | 6.16  | 64.02   | 13.48       | 69.47 | 35   |
| 22   | Ethylmethylketone + 2-heptanol            | 298.15   | 104.13  | 49.16   | 17.61 | 104.13 | 12.68 | 74.33   | 16.65       | 80.80 | 35   |
| 23   | ethanol + methylacetate                   | 293.15   | 38.78   | 31.57   | 25.17 | 38.78  | 15.38 | 57.42   | 23.29       | 38.44 | 36   |
| 24   | ethanol +ethylacetate                     | 293.15   | 32.92   | 27.85   | 23.20 | 32.92  | 13.29 | 48.18   | 23.29       | 29.54 | 36   |
| 25   | methanol + ethylacetate                   | 293.15   | 9.97    | 9.65    | 9.34  | 9.97   | 5.24  | 30.75   | 15.99       | 3.39  | 36   |
| 26   | methanol + methylacetate                  | 293.15   | 13.37   | 12.58   | 11.80 | 13.37  | 7.11  | 29.00   | 15.48       | 9.87  | 36   |
| 27   | N,N-dimethylaniline +p-chloroacetophenone | 303.15   | 5.32    | 3.01    | 0.85  | 5.32   | 1.38  | 2.82    | 1.20        | 3.36  | 37   |
| 28   | N,N-dimethylaniline +p-methylacetophenone | 303.15   | 2.84    | 2.42    | 2.00  | 2.84   | 2.10  | 2.13    | 1.82        | 4.38  | 37   |
| 29   | N,N-dimethylaniline +propiofenone         | 303.15   | 2.19    | 1.89    | 1.59  | 2.19   | 1.70  | 1.64    | 1.69        | 5.03  | 37   |
| 30   | 1,4-Dioxane + Hexane                      | 298.15   | 40.11   | 29.16   | 19.74 | 40.11  | 14.82 | 32.22   | 16.15       | 20.98 | 34   |
| 31   | Ethyl Chloroacetate + Hexane              | 298.15   | 25.96   | 17.26   | 9.68  | 25.96  | 10.29 | 14.88   | 8.95        | 9.93  | 38   |
| 32   | Ethyl Chloroacetate + Heptane             | 298.15   | 21.67   | 16.12   | 11.07 | 21.67  | 10.62 | 14.88   | 9.35        | 5.15  | 38   |
| 33   | Ethyl Chloroacetate + octane              | 298.15   | 15.44   | 12.24   | 9.20  | 15.44  | 8.23  | 11.78   | 7.57        | 0.96  | 38   |
| 34   | Ethyl Chloroacetate + Nonane              | 298.15   | 12.62   | 11.25   | 9.92  | 12.62  | 8.97  | 10.75   | 8.13        | 0.91  | 38   |
| 35   | Ethyl Chloroacetate + Decane              | 298.15   | 7.84    | 7.42    | 7.00  | 7.84   | 6.28  | 7.48    | 5.91        | 5.78  | 38   |
| 36   | Ethyl Chloroacetate+ Dodecane             | 298.15   | 6.04    | 5.86    | 5.68  | 6.04   | 5.87  | 5.66    | 5.51        | 4.70  | 38   |
| 37   | 2-propanol +                              | 298.15   | 47.84   | 41.14   | 34.98 | 47.84  | 26.56 | 58.11   | 33.09       | 39.09 | 39   |

|    | tetrahydropyran                                             |        |       |       |       |       |       |       |       |       |    |
|----|-------------------------------------------------------------|--------|-------|-------|-------|-------|-------|-------|-------|-------|----|
| 38 | 1,4-Dioxane + 1-Propanol                                    | 298.15 | 37.96 | 36.32 | 34.70 | 37.96 | 30.84 | 43.96 | 32.05 | 32.66 | 40 |
| 39 | 1,4-Dioxane + 2-Propanol                                    | 298.15 | 44.25 | 42.30 | 40.38 | 44.25 | 36.19 | 45.95 | 36.20 | 39.80 | 40 |
| 40 | 3-Pentanone + Ethylbenzene                                  | 293.15 | 1.78  | 1.17  | 0.58  | 1.78  | 0.99  | 0.97  | 0.76  | 3.84  | 41 |
| 41 | 3-Pentanone + o-Xylene                                      | 293.15 | 3.60  | 2.25  | 0.94  | 3.60  | 1.37  | 1.90  | 1.08  | 2.00  | 41 |
| 42 | 2-Butoxyethanol + 1-hexanol                                 | 298.15 | 9.72  | 8.76  | 7.82  | 9.72  | 7.64  | 9.86  | 6.99  | 3.11  | 42 |
| 43 | 2-Butoxyethanol + 1-octanol                                 | 298.15 | 15.46 | 11.15 | 7.14  | 15.46 | 5.85  | 12.20 | 6.31  | 6.60  | 42 |
| 44 | 2-Butoxyethanol + 1-decanol                                 | 298.15 | 20.90 | 11.61 | 3.72  | 20.90 | 2.83  | 13.17 | 3.86  | 7.97  | 42 |
| 45 | m-xylene+decane                                             | 308.15 | 3.79  | 3.27  | 2.75  | 3.79  | 3.37  | 2.91  | 3.15  | 5.72  | 43 |
| 46 | cyclohexane + m xylene                                      | 308.15 | 11.26 | 10.58 | 9.91  | 11.26 | 8.58  | 11.62 | 8.67  | 2.06  | 43 |
| 47 | cyclohexane + cyclooctane                                   | 308.15 | 9.27  | 5.74  | 2.38  | 9.27  | 3.02  | 5.08  | 2.55  | 0.95  | 43 |
| 48 | cyclohexane + chlorobenzene                                 | 308.15 | 7.97  | 7.91  | 7.85  | 7.97  | 7.36  | 8.32  | 7.06  | 1.22  | 43 |
| 49 | cyclohexane + decane                                        | 308.15 | 2.87  | 2.87  | 2.86  | 2.87  | 2.46  | 7.17  | 4.84  | 1.38  | 43 |
| 50 | m xylene+ cyclooctane                                       | 308.15 | 38.51 | 28.71 | 20.10 | 38.51 | 16.14 | 30.18 | 16.47 | 16.68 | 43 |
| 51 | m xylene+ chlorobenzene                                     | 308.15 | 0.376 | 0.144 | 0.187 | 0.376 | 0.19  | 0.21  | 0.16  | 6.27  | 43 |
| 52 | cyclooctane + chlorobenzene                                 | 308.15 | 20.43 | 15.05 | 10.14 | 20.43 | 7.47  | 16.78 | 8.30  | 5.45  | 43 |
| 53 | cyclooctane + decane                                        | 308.15 | 18.43 | 14.14 | 10.15 | 18.43 | 5.59  | 19.80 | 8.75  | 2.50  | 43 |
| 54 | chlorobenzene +decane                                       | 308.15 | 4.03  | 4.00  | 4.00  | 4.02  | 4.07  | 4.58  | 4.40  | 1.30  | 43 |
| 55 | DEGMME + CH <sub>3</sub> (CH <sub>2</sub> ) <sub>5</sub> OH | 298.15 | 18.65 | 18.26 | 17.86 | 18.65 | 16.76 | 23.02 | 18.52 | 2.71  | 64 |
| 56 | DEGMME + CH <sub>3</sub> (CH <sub>2</sub> ) <sub>7</sub> OH | 298.15 | 20.35 | 17.80 | 15.24 | 20.35 | 13.63 | 22.36 | 17.87 | 2.57  | 64 |
| 57 | DEGMME + CH <sub>3</sub> (CH <sub>2</sub> ) <sub>9</sub> OH | 298.15 | 26.11 | 19.55 | 13.29 | 26.11 | 11.55 | 24.87 | 18.19 | 2.36  | 64 |
| 58 | 1-Chlorohexadecane + 1,2,4-Trimethylcyclohexane             | 298.15 | 15.32 | 2.60  | 15.34 | 15.32 | 12.28 | 0.54  | 11.50 | 17.0  | 44 |
| 59 | 1-Chlorohexadecane + Cyclohexane                            | 298.15 | 5.00  | 10.25 | 21.67 | 5.00  | 12.28 | 8.05  | 11.92 | 24.8  | 44 |
| 60 | 1-Chlorohexadecane + Benzene                                | 298.15 | 19.96 | 4.58  | 20.58 | 19.96 | 10.25 | 1.76  | 9.83  | 5.6   | 44 |
| 61 | 1-Chlorohexadecane + Methylcyclohexane                      | 298.15 | 15.39 | 5.32  | 19.74 | 15.39 | 13.26 | 3.01  | 12.84 | 21.8  | 44 |
| 62 | 1-Chlorohexadecane + Toluene                                | 298.15 | 25.89 | 2.83  | 20.04 | 25.89 | 12.65 | 11.90 | 1.46  | 3.5   | 44 |
| 63 | 1-Chlorohexadecane + p-Xylene                               | 298.15 | 25.80 | 1.47  | 15.05 | 25.80 | 12.88 | 4.51  | 9.24  | 2.5   | 44 |
| 64 | 1-Chlorohexane + Cyclohexane                                | 298.15 | 10.09 | 9.74  | 9.40  | 10.09 | 7.95  | 14.82 | 10.75 | 4.1   | 44 |
| 65 | 1-Chlorohexane + (cis + trans) Dimethylcyclohexane          | 298.15 | 5.52  | 5.16  | 4.81  | 5.52  | 4.42  | 5.98  | 4.85  | 2.5   | 44 |
| 66 | 1-Chlorohexane + Benzene                                    | 298.15 | 6.05  | 5.96  | 5.87  | 6.05  | 6.21  | 8.56  | 7.69  | 2.5   | 44 |
| 67 | 1-Chlorohexane + Methylcyclohexane                          | 298.15 | 3.03  | 3.03  | 3.03  | 3.03  | 3.01  | 3.72  | 3.41  | 1.5   | 44 |
| 68 | 1-Chlorohexane + Toluene                                    | 298.15 | 2.76  | 2.52  | 2.28  | 2.76  | 2.70  | 2.97  | 2.95  | 4.5   | 44 |
| 69 | 1-Chlorohexane + o-Xylene                                   | 298.15 | 1.81  | 1.78  | 1.75  | 1.81  | 1.60  | 2.30  | 1.89  | 5.1   | 44 |
| 70 | 2-Ethoxyethanol + 2,2,4-Trimethylpentane                    | 298.15 | 36.04 | 24.88 | 15.32 | 36.04 | 6.12  | 45.34 | 15.93 | 16.3  | 45 |
| 71 | 2-Ethoxyethanol + Acetonitrile                              | 298.15 | 23.66 | 8.62  | 3.24  | 23.66 | 3.21  | 9.87  | 2.59  | 10.8  | 48 |
| 72 | 2-Ethoxyethanol + Butanol                                   | 298.15 | 6.42  | 5.92  | 5.41  | 6.42  | 4.42  | 8.41  | 5.78  | 0.8   | 46 |
| 73 | 2-Ethoxyethanol + Chlorobenzene                             | 298.15 | 25.64 | 18.51 | 13.54 | 25.64 | 9.06  | 32.18 | 11.09 | 21.7  | 47 |
| 74 | 2-Ethoxyethanol + Cyclohexane                               | 298.15 | 13.94 | 11.46 | 9.19  | 13.94 | 8.53  | 13.09 | 9.23  | 5.2   | 45 |
| 75 | 2-Ethoxyethanol + Decane                                    | 298.15 | 20.33 | 17.11 | 14.07 | 20.33 | 8.16  | 33.09 | 16.29 | 4.7   | 45 |
| 76 | 2-Ethoxyethanol + Dioxane                                   | 298.15 | 13.67 | 12.65 | 11.64 | 13.67 | 13.05 | 13.48 | 11.65 | 7.7   | 48 |
| 77 | 2-Ethoxyethanol + Ethanol                                   | 298.15 | 3.75  | 4.97  | 6.11  | 3.75  | 3.87  | 2.10  | 2.27  | 11.0  | 46 |
| 78 | 2-Ethoxyethanol + Heptane                                   | 298.15 | 48.15 | 33.01 | 20.59 | 48.15 | 11.46 | 52.66 | 19.01 | 26.4  | 45 |

|     |                                                   |        |       |       |       |       |       |       |       |      |    |
|-----|---------------------------------------------------|--------|-------|-------|-------|-------|-------|-------|-------|------|----|
| 79  | 2-Ethoxyethanol + Heptanol                        | 298.15 | 18.35 | 10.85 | 4.60  | 18.35 | 4.22  | 13.46 | 5.17  | 7.5  | 46 |
| 80  | 2-Ethoxyethanol + Hexane                          | 298.15 | 54.13 | 33.18 | 17.21 | 54.13 | 11.01 | 52.11 | 15.23 | 31.0 | 45 |
| 81  | 2-Ethoxyethanol + Hexanol                         | 298.15 | 15.56 | 11.15 | 7.11  | 15.56 | 6.25  | 13.50 | 7.27  | 6.9  | 46 |
| 82  | 2-Ethoxyethanol + Methanol                        | 298.15 | 7.04  | 12.68 | 16.87 | 7.04  | 12.07 | 9.69  | 9.89  | 15.1 | 46 |
| 83  | 2-Ethoxyethanol + Nonane                          | 298.15 | 27.08 | 21.18 | 15.80 | 27.08 | 9.55  | 38.50 | 17.15 | 9.9  | 45 |
| 84  | 2-Ethoxyethanol + Octane                          | 298.15 | 36.45 | 26.73 | 18.29 | 36.45 | 10.97 | 45.29 | 18.91 | 17.2 | 45 |
| 85  | 2-Ethoxyethanol + Octanol                         | 298.15 | 20.40 | 9.60  | 1.48  | 20.40 | 3.92  | 12.49 | 2.63  | 7.1  | 46 |
| 86  | 2-Ethoxyethanol + Pentanol                        | 298.15 | 11.88 | 9.78  | 7.74  | 11.88 | 6.54  | 12.18 | 7.75  | 4.6  | 46 |
| 87  | 2-Ethoxyethanol + Propanol                        | 298.15 | 5.25  | 5.22  | 5.19  | 5.25  | 7.59  | 9.05  | 6.77  | 1.6  | 46 |
| 88  | 2-Ethoxyethanol + Tetrahydrofuran                 | 298.15 | 15.75 | 6.97  | 3.85  | 15.75 | 4.84  | 10.99 | 3.41  | 5.2  | 48 |
| 89  | 2-Methoxyethanol + Tetrahydrofuran                | 298.15 | 6.08  | 3.85  | 8.52  | 6.08  | 11.04 | 4.93  | 8.50  | 11.7 | 49 |
| 90  | 2-Propoxyethanol + N,N-Dimethylformamide          | 298.15 | 1.93  | 3.07  | 6.73  | 1.93  | 8.97  | 2.42  | 5.89  | 4.9  | 50 |
| 91  | Acetone + Benzene                                 | 298.15 | 7.10  | 4.83  | 2.67  | 7.10  | 3.56  | 4.91  | 3.48  | 2.0  | 44 |
| 92  | Acetone + Chlorohexane                            | 298.15 | 1.91  | 1.40  | 4.48  | 1.91  | 1.54  | 0.54  | 0.44  | 3.1  | 44 |
| 93  | Acetone + Cyclohexane                             | 298.15 | 25.61 | 18.79 | 12.67 | 25.61 | 13.97 | 19.69 | 14.13 | 4.5  | 44 |
| 94  | Acetone + Ethyl Acetate                           | 298.15 | 0.48  | 1.00  | 1.51  | 0.48  | 0.56  | 0.30  | 0.27  | 7.3  | 44 |
| 95  | Acetone + Propyl Propionate                       | 298.15 | 0.25  | 2.65  | 4.93  | 0.25  | 1.70  | 0.68  | 0.69  | 5.3  | 44 |
| 96  | Acetone + Toluene                                 | 298.15 | 2.49  | 1.10  | 2.39  | 2.49  | 1.18  | 1.46  | 1.31  | 4.0  | 44 |
| 97  | Acetone + cis 1,2 Dimethylcyclohexane             | 298.15 | 21.60 | 13.57 | 6.44  | 21.60 | 10.93 | 13.98 | 10.76 | 3.6  | 44 |
| 98  | Acetone + o-Xylene                                | 298.15 | 3.72  | 0.58  | 4.07  | 3.72  | 2.04  | 0.97  | 0.94  | 0.7  | 44 |
| 99  | Cyclohexane + Benzene                             | 298.15 | 21.26 | 20.11 | 18.98 | 21.26 | 18.87 | 20.57 | 14.04 | 6.5  | 51 |
| 100 | Ethyl Acetate + (cis + trans) Dimethylcyclohexane | 298.15 | 13.54 | 10.45 | 7.54  | 13.54 | 8.03  | 10.92 | 8.13  | 0.4  | 44 |
| 101 | Ethyl Acetate + Benzene                           | 298.15 | 6.26  | 5.67  | 5.08  | 6.26  | 6.32  | 7.37  | 5.22  | 0.5  | 44 |
| 102 | Ethyl Acetate + Chlorohexadecane                  | 298.15 | 33.03 | 4.22  | 23.83 | 33.03 | 17.00 | 3.04  | 5.24  | 15.9 | 44 |
| 103 | Ethyl Acetate + Chlorohexane                      | 298.15 | 3.27  | 2.13  | 1.02  | 3.27  | 3.43  | 2.23  | 1.90  | 2.9  | 44 |
| 104 | Ethyl Acetate + Cyclohexane                       | 298.15 | 25.85 | 22.52 | 19.36 | 25.85 | 17.27 | 26.71 | 15.10 | 11.4 | 44 |
| 105 | Ethyl Acetate + Toluene                           | 298.15 | 1.62  | 1.31  | 1.00  | 1.62  | 2.96  | 1.45  | 1.02  | 4.8  | 44 |
| 106 | Ethyl Acetate + o-Xylene                          | 298.15 | 3.22  | 1.67  | 0.17  | 3.22  | 1.46  | 1.87  | 0.49  | 1.7  | 44 |
| 107 | Ethylenediamine + 1-Butanol                       | 298.15 | 5.86  | 7.19  | 8.49  | 5.86  | 8.18  | 7.06  | 5.17  | 10.8 | 52 |
| 108 | Ethylenediamine + 2-Propanol                      | 298.15 | 2.06  | 2.51  | 3.06  | 2.06  | 3.34  | 2.06  | 3.06  | 6.5  | 52 |
| 109 | Ethylenediamine + Decanol                         | 298.15 | 11.79 | 9.85  | 21.45 | 11.79 | 20.42 | 8.97  | 10.34 | 10.4 | 63 |
| 110 | Ethylenediamine + Hexanol                         | 298.15 | 3.77  | 4.63  | 9.18  | 3.77  | 7.09  | 4.53  | 7.20  | 7.0  | 63 |
| 111 | Ethylenediamine + Octanol                         | 298.15 | 8.48  | 7.50  | 15.43 | 8.48  | 11.53 | 7.42  | 9.01  | 8.5  | 63 |
| 112 | Ethylenediamine + 2-methyl-propanol               | 298.15 | 4.81  | 5.63  | 7.41  | 4.81  | 7.46  | 5.42  | 3.18  | 7.1  | 52 |
| 113 | Methyl Ethyl Ketone + Benzene                     | 298.15 | 6.41  | 5.34  | 4.29  | 6.41  | 4.16  | 5.81  | 4.35  | 0.6  | 44 |
| 114 | Methyl Ethyl Ketone + Chlorohexadecane            | 298.15 | 31.34 | 7.74  | 29.76 | 31.34 | 19.59 | 1.61  | 8.90  | 12.6 | 44 |
| 115 | Methyl Ethyl Ketone + Chlorohexane                | 298.15 | 1.41  | 0.53  | 2.23  | 1.41  | 2.01  | 0.73  | 0.66  | 5.3  | 44 |
| 116 | Methyl Ethyl Ketone + Ethyl Acetate               | 298.15 | 0.44  | 0.36  | 0.30  | 0.44  | 2.47  | 0.74  | 0.68  | 7.1  | 44 |
| 117 | Methyl Ethyl Ketone + Methyl Cyclohexane          | 298.15 | 9.11  | 7.34  | 5.62  | 9.11  | 6.65  | 7.36  | 5.02  | 1.4  | 44 |

|     |                                                |        |              |              |              |              |             |              |             |              |    |
|-----|------------------------------------------------|--------|--------------|--------------|--------------|--------------|-------------|--------------|-------------|--------------|----|
| 118 | Methyl Ethyl Ketone + Propyl Propionate        | 298.15 | 0.38         | 0.98         | 2.20         | 0.38         | 1.53        | 0.14         | 0.13        | 6.6          | 44 |
| 119 | Methyl Ethyl Ketone + Toluene                  | 298.15 | 1.75         | 1.10         | 0.45         | 1.75         | 2.49        | 1.16         | 0.99        | 4.7          | 44 |
| 120 | Methyl Ethyl Ketone + p-Xylene                 | 298.15 | 1.59         | 1.13         | 1.00         | 1.59         | 2.29        | 1.33         | 1.30        | 5.0          | 44 |
| 121 | Propyl Propionate + 1,2,3 Trimethylcyclohexane | 298.15 | 5.44         | 5.19         | 4.94         | 5.44         | 6.05        | 5.21         | 4.97        | 0.8          | 44 |
| 122 | Propyl Propionate + Benzene                    | 298.15 | 2.77         | 2.77         | 2.76         | 2.77         | 2.72        | 5.47         | 4.25        | 5.0          | 44 |
| 123 | Propyl Propionate + Chlorohexadecane           | 298.15 | 25.90        | 2.27         | 16.32        | 25.90        | 12.51       | 4.98         | 9.20        | 9.8          | 44 |
| 124 | Propyl Propionate + Chlorohexane               | 298.15 | 1.06         | 1.02         | 0.97         | 1.06         | 1.98        | 1.02         | 0.90        | 6.3          | 44 |
| 125 | Propyl Propionate + Methylcyclohexane          | 298.15 | 6.03         | 6.00         | 5.97         | 6.03         | 5.77        | 6.85         | 6.25        | 0.7          | 44 |
| 126 | Propyl Propionate + Toluene                    | 298.15 | 0.24         | 0.16         | 0.14         | 0.24         | 2.29        | 0.67         | 0.58        | 6.9          | 44 |
| 127 | Propyl Propionate + p-Xylene                   | 298.15 | 0.82         | 0.81         | 0.81         | 0.82         | 1.83        | 0.90         | 0.88        | 6.3          | 44 |
| 128 | Undecane + Dodecane                            | 298.15 | 1.75         | 1.48         | 1.24         | 1.75         | 2.66        | 1.50         | 1.30        | 5.5          | 29 |
| 129 | Undecane + Hexadecane                          | 298.15 | 7.12         | 1.79         | 3.00         | 7.12         | 2.76        | 2.42         | 1.78        | 2.3          | 29 |
| 130 | Acetone + 2-Propanol                           | 298.15 | 104.72       | 70.43        | 45.11        | 104.72       | 39.11       | 102.39       | 30.01       | 1.4          | 53 |
| 131 | Acetone + Carbon Tetrachloride                 | 298.15 | 16.66        | 9.83         | 3.82         | 16.66        | 14.34       | 14.16        | 12.02       | 1.7          | 53 |
| 132 | Acetone + Cyclohexane                          | 298.15 | 35.16        | 27.48        | 20.75        | 35.16        | 24.04       | 28.50        | 18.11       | 11.7         | 53 |
| 133 | Acetone + Ethanol                              | 298.15 | 41.61        | 31.02        | 21.37        | 41.61        | 11.90       | 50.90        | 16.79       | 44.3         | 53 |
| 134 | Acetone + Hexane                               | 298.15 | 5.44         | 5.44         | 5.43         | 5.44         | 8.09        | 9.03         | 7.09        | 3.2          | 53 |
| 135 | Acetone + Methanol                             | 298.15 | 11.65        | 9.63         | 7.72         | 11.65        | 9.14        | 28.23        | 9.68        | 6.4          | 53 |
| 136 | Carbon Tetrachloride + 2-Propanol              | 298.15 | 24.01        | 19.77        | 15.88        | 24.01        | 10.02       | 71.23        | 7.21        | 42.6         | 53 |
| 137 | Carbon Tetrachloride + Cyclohexane             | 298.15 | 3.93         | 3.93         | 3.93         | 3.93         | 7.09        | 12.03        | 7.94        | 1.8          | 53 |
| 138 | Chloroform + Methanol                          | 298.15 | 10.54        | 10.55        | 10.55        | 10.54        | 12.96       | 25.87        | 4.95        | 10.7         | 53 |
| 139 | Cyclohexane + 2-Propanol                       | 298.15 | 27.73        | 23.40        | 19.36        | 27.73        | 13.47       | 37.87        | 9.07        | 33.4         | 53 |
| 140 | Dimethyl Sulfoxide + Chloroform                | 298.15 | 7.07         | 14.07        | 20.46        | 7.07         | 28.92       | 5.58         | 15.05       | 4.7          | 53 |
| 141 | Dimethyl Sulfoxide + Methanol                  | 298.15 | 34.77        | 24.63        | 15.53        | 34.77        | 24.14       | 26.59        | 10.09       | 16.9         | 53 |
| 142 | Ethanol + 2-Propanol                           | 298.15 | 5.45         | 3.34         | 1.35         | 10.28        | 7.66        | 3.43         | 2.06        | 2.8          | 53 |
| 143 | Ethanol + Cyclohexane                          | 298.15 | 8.33         | 8.13         | 7.93         | 8.33         | 8.50        | 19.13        | 5.01        | 1.7          | 53 |
| 144 | Hexane + Chloroform                            | 298.15 | 2.09         | 0.71         | 1.44         | 4.09         | 2.78        | 0.66         | 0.77        | 2.3          | 53 |
| 145 | Hexane + Cyclohexane                           | 298.15 | 22.51        | 14.97        | 8.44         | 22.51        | 9.98        | 23.15        | 6.01        | 2.2          | 53 |
| 146 | Hexane + Ethanol                               | 298.15 | 16.69        | 7.01         | 2.97         | 16.69        | 25.67       | 46.17        | 2.79        | 8.9          | 53 |
| 147 | Methanol + 2-Propanol                          | 298.15 | 30.13        | 19.34        | 10.34        | 30.13        | 14.99       | 19.99        | 10.92       | 21.5         | 53 |
| 148 | Methanol + Ethanol                             | 298.15 | 7.73         | 5.24         | 2.93         | 7.73         | 4.42        | 5.32         | 4.31        | 0.7          | 53 |
| 149 | Methyl Acetate + Hexane                        | 298.15 | 7.05         | 6.83         | 6.61         | 7.05         | 7.24        | 8.19         | 6.85        | 1.0          | 53 |
| 150 | Triethylamine + Chlorobenzene                  | 298.15 | 2.28         | 1.15         | 3.07         | 2.28         | 3.56        | 1.19         | 2.97        | 6.6          | 53 |
| 151 | Triethylamine + Chloroform                     | 298.15 | 25.97        | 26.57        | 27.16        | 25.97        | 26.94       | 26.55        | 26.96       | 27.0         | 53 |
| 152 | Triethylamine + Methanol                       | 298.15 | 21.38        | 22.12        | 22.84        | 21.38        | 28.46       | 11.05        | 12.74       | 28.2         | 53 |
|     | <b>Grand AAPD</b>                              |        | <b>19.40</b> | <b>13.31</b> | <b>10.68</b> | <b>19.44</b> | <b>9.20</b> | <b>18.17</b> | <b>8.98</b> | <b>12.26</b> |    |

**Table S3:** Comparison of AAPD values of various viscosity relations for ternary systems.

| S. No. | Ternary systems                                      | Temp (K) | BING         | Frenkel      | KM           | H U          | SW           | Model 1      | Logarithmic  | ECN           | Ref |
|--------|------------------------------------------------------|----------|--------------|--------------|--------------|--------------|--------------|--------------|--------------|---------------|-----|
| 1      | Cyclohexane +m-xylene + cyclooctane                  | 308.15   | 21.47        | 23.22        | 11.82        | 61.14        | 10.35        | 20.17        | 12.31        | 7.32          | 43  |
| 2      | cyclohexane +m-xylene + chlorobenzene                | 308.15   | 8.06         | 7.66         | 8.00         | 42.65        | 6.40         | 10.11        | 7.74         | 1.54          | 43  |
| 3      | 1-Butanol + 1-Chlorobutane+ 1-Butylamine             | 298.15   | 40.99        | 53.67        | 9.50         | 101.05       | 2.36         | 46.93        | 9.77         | †             | 54  |
| 4      | 2-Methyl-1-propanol +1-Chlorobutane + 1 Butylamine   | 298.15   | 70.94        | 99.32        | 18.60        | 141.11       | 5.49         | 80.16        | 19.08        | †             | 54  |
| 5      | 2-propanol+ tetrahydropyran + 2,2,4 trimethylpentane | 303.15   | 60.20        | 71.94        | 41.16        | 123.42       | 26.14        | 89.45        | 42.16        | 40.29         | 32  |
| 6      | cyclohexane +m-xylene + decane                       | 308.15   | 7.16         | 6.74         | 6.27         | 40.21        | 5.75         | 10.51        | 7.78         | 1.05          | 43  |
| 7      | water + ethylacetate +ethanol                        | 298.15   | 23.82        | 30.44        | 22.98        | 41.14        | 37.85        | 53.80        | 22.02        | †             | 55  |
| 8      | cyclohexane + cyclooctane + chlorobenzene            | 308.15   | 14.84        | 16.3         | 7.91         | 52.92        | 7.36         | 13.82        | 8.56         | 2.82          | 43  |
| 9      | Carbon Tetrachloride+ Cyclohexane + Benzene          | 298.15   | 2.19         | 24.29        | 4.68         | 37.07        | 2.48         | 5.56         | 4.08         | †             | 56  |
| 10     | cyclohexane +cyclooctane + decane                    | 308.15   | 11.68        | 12.73        | 5.75         | 49.44        | 4.45         | 14.07        | 7.29         | 1.25          | 43  |
| 11     | water +ethanol + EG                                  | 298.15   | 40.22        | 74.16        | 38.65        | 76.90        | 36.54        | 68.82        | 42.26        | 34.03         | 57  |
| 12     | cyclohexane + chlorobenzene + decane                 | 308.15   | 6.21         | 6.43         | 6.32         | 39.67        | 50.92        | 9.66         | 7.68         | 0.38          | 43  |
| 13     | Methyl benzoate + Cyclohexane + 1-Propanol           | 303.15   | 21.73        | 50.75        | 19.86        | 60.22        | 17.02        | 29.04        | 20.70        | 18.73         | 58  |
| 14     | m-xylene +cyclooctane + chlorobenzene                | 308.15   | 23.60        | 23.76        | 13.12        | 65.69        | 9.24         | 22.77        | 11.44        | 6.37          | 43  |
| 15     | Methyl benzoate + Cyclohexane + 1-Butanol            | 303.15   | 32.75        | 51.70        | 26.79        | 73.96        | 26.78        | 37.87        | 27.11        | 18.61         | 58  |
| 16     | m-xylene + cyclooctane + decane                      | 308.15   | 21.44        | 22.04        | 12.87        | 64.46        | 8.33         | 22.99        | 11.18        | 5.92          | 43  |
| 17     | Methyl benzoate +Cyclohexane + 1-Pentanol            | 303.15   | 30.21        | 38.24        | 18.93        | 68.66        | 19.06        | 32.10        | 20.60        | 12.89         | 58  |
| 18     | m-xylene + chlorobenzene+ decane                     | 308.15   | 4.58         | 24.47        | 4.02         | 36.63        | 3.26         | 3.58         | 3.02         | 2.79          | 43  |
| 19     | cyclooctane + chlorobenzene+decane                   | 308.15   | 18.70        | 21.31        | 10.81        | 57.40        | 8.58         | 21.36        | 11.20        | 4.82          | 43  |
| 20     | Methyl benzoate +Cyclohexane + 1-hexanol             | 303.15   | 35.25        | 37.13        | 20.44        | 75.17        | 19.88        | 34.29        | 19.28        | 15.54         | 58  |
| 21     | Methanol + Ethanol + Water                           | 283.15   | 45.86        | 33.58        | 49.66        | 29.17        | 48.66        | 39.29        | 38.54        | 50.74         | 59  |
| 22     | Ethanol + 1-Propanol + Water                         | 303.15   | 32.56        | 16.05        | 35.67        | 11.89        | 37.37        | 14.37        | 27.88        | 41.88         | 59  |
| 23     | Methanol + Ethanol + 1-Propanol                      | 303.15   | 7.77         | 29.08        | 2.25         | 48.49        | 2.33         | 2.61         | 0.75         | 2.38          | 59  |
| 24     | n-hexane+ cyclohexane+ benzene                       | 298.15   | 42.62        | 29.92        | 31.00        | 56.92        | 27.73        | 31.15        | 20.67        | 15.33         | 51  |
| 25     | Ethanol +benzene+ n heptane                          | 298.15   | 27.57        | 39.94        | 18.87        | 58.49        | 8.18         | 52.67        | 21.83        | 16.86         | 60  |
|        | <b>Grand AAPD</b>                                    |          | <b>25.32</b> | <b>33.70</b> | <b>17.22</b> | <b>60.80</b> | <b>17.24</b> | <b>29.77</b> | <b>17.00</b> | <b>14.18*</b> |     |

\*Grand AAPD values for 21 systems.

† Insufficient Data

**Table S4:** Comparison of AAPD values of various viscosity models for Quaternary and Quinary systems at 308.15 K.

| S.No | Quaternary Systems                                         | Bingham*    | KM*         | HU           | SW*          | Model 1     | Logarithmic | GN*         | C-R-K*      | Arrhenius*   |
|------|------------------------------------------------------------|-------------|-------------|--------------|--------------|-------------|-------------|-------------|-------------|--------------|
| 1    | Toluene + Octane + Ethylbenzene + Tetradecane              | 7.27        | 1.70        | 15.79        | 103.05       | 2.83        | 1.16        | 4.21        | 4.10        | 5.43         |
| 2    | Toluene + Octane + Ethylbenzene + Hexadecane               | 9.69        | 5.44        | 18.59        | 87.13        | 1.62        | 1.86        | 3.29        | 9.74        | 14.46        |
| 3    | Toluene + Ethylbenzene + Tetradecane + Hexadecane          | 6.38        | 5.17        | 15.26        | 74.11        | 0.61        | 1.44        | 1.05        | 9.52        | 14.62        |
| 4    | Octane + Ethylbenzene + Tetradecane + Hexadecane           | 6.91        | 4.75        | 15.02        | 99.94        | 1.17        | 2.12        | 3.86        | 7.98        | 12.78        |
| 5    | Toluene + Octane + Tetradecane + Hexadecane                | 7.28        | 5.60        | 15.64        | 91.94        | 1.03        | 2.20        | 1.45        | 9.33        | 13.79        |
|      | <b>Grand AAPD</b>                                          | <b>7.51</b> | <b>4.53</b> | <b>16.06</b> | <b>91.23</b> | <b>1.45</b> | <b>1.75</b> | <b>2.77</b> | <b>8.13</b> | <b>12.21</b> |
|      | <b>Quinary System</b>                                      |             |             |              |              |             |             |             |             |              |
| 6    | Toluene + Octane + Ethylbenzene + Tetradecane + Hexadecane | 12.24       | 7.84        | 16.92        | 53.52        | 16.82       | 2.08        | 2.34        | 7.01        | 11.26        |

\*Ref#[28,61]

**Table S5:** Comparison of AAPD values of various viscosity relations for Hexanary systems at 298.15 K.

| S.No | Quinary systems                                       | Bingham *    | KM *        | Model 1     | Logarithmic | SW*         | Additive*   |
|------|-------------------------------------------------------|--------------|-------------|-------------|-------------|-------------|-------------|
| 1    | Acetone + 5 component Hydrocarbon Mixture             | 7.53         | 4.76        | 3.42        | 2.68        | 5.73        | 0.67        |
| 2    | Di isopropyl ether + 5 component Hydrocarbon Mixture  | 7.03         | 4.67        | 0.57        | 0.05        | 7.68        | 1.21        |
| 3    | Methyl ethyl ketone + 5 component Hydrocarbon Mixture | 27.97        | 19.06       | 2.94        | 2.25        | 10.34       | 15.54       |
|      | <b>Grand AAPD</b>                                     | <b>14.18</b> | <b>9.50</b> | <b>2.31</b> | <b>1.66</b> | <b>7.92</b> | <b>5.81</b> |

\* Ref# [11,62]
